# Supplementary material
Source: Springer Nature journal article supplement (https://www.springermedizin.de/resource/supplementary/13054_2010_9350_MOESM5_ESM.pdf/9706020)

HLA-DR in Molecules per Monocyte

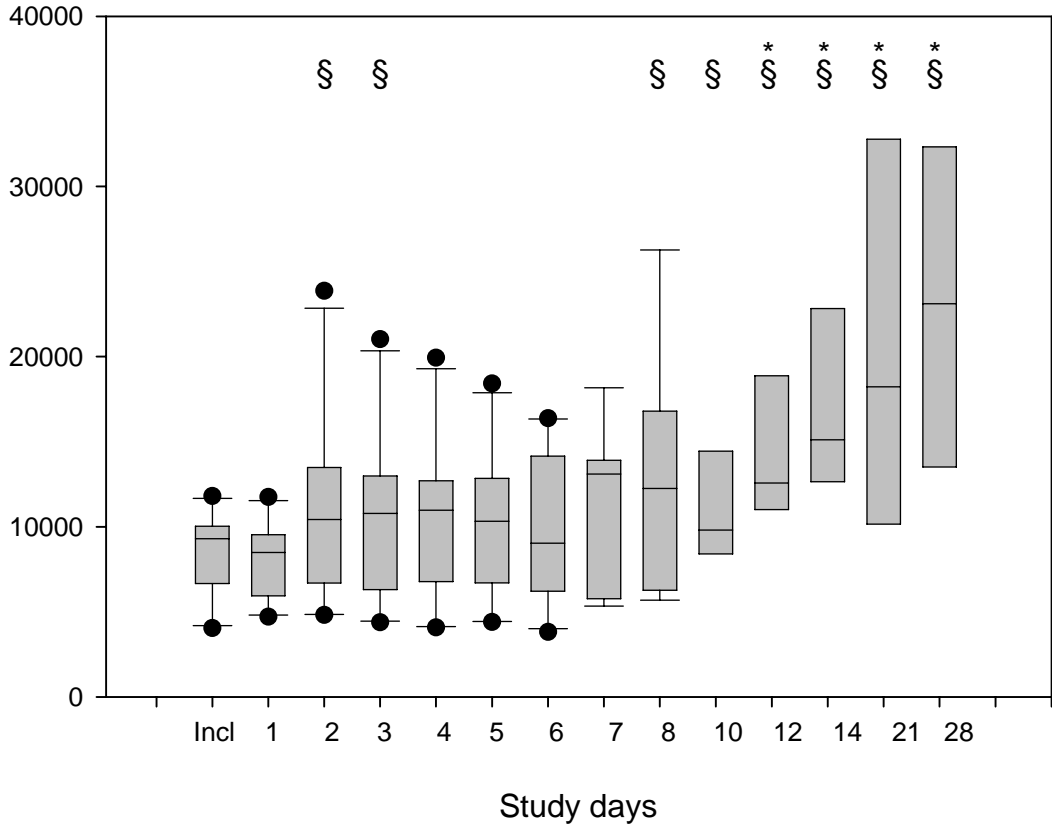

Supplement: MOESM5 [file 9706020]
